# Supplementary material
Source: Springer Nature journal article supplement (https://www.springermedizin.de/resource/supplementary/13054_2013_3056_MOESM5_ESM.pdf/9712594)

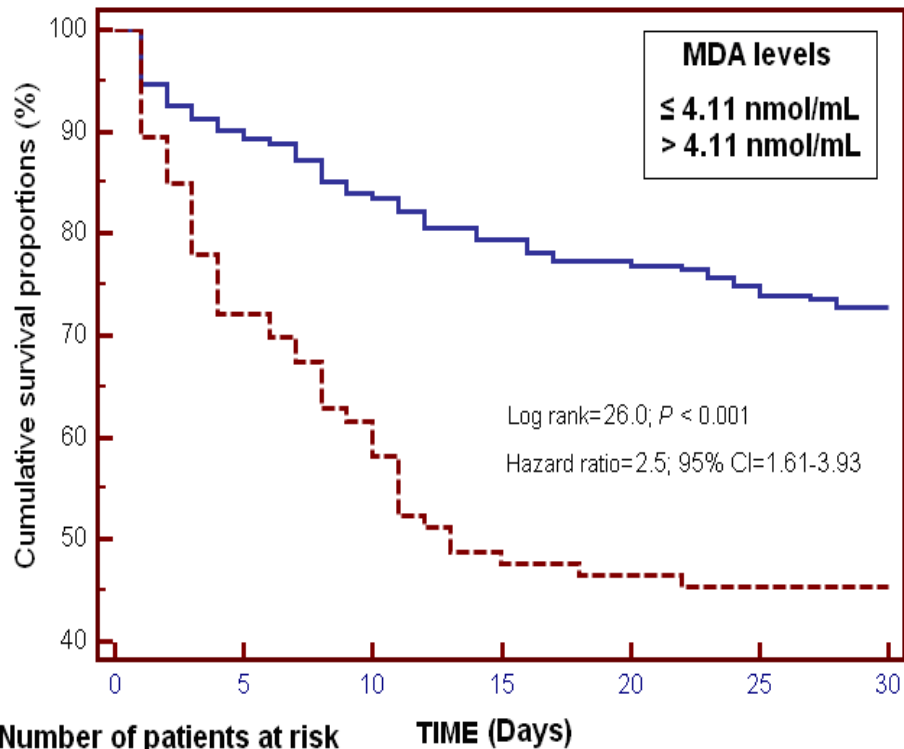

**Number of patients at risk**

**TIME (Days)**

**Group  $\leq 4.11$**

242      216      202      192      186      179      176

**Group  $> 4.11$**

86      62      50      41      40      39      39

Supplement: MOESM5 [file 9712594]
